# Supplementary material for: Comparative Metabolite Profiling and Fingerprinting of Medicinal Cinnamon Bark and Its Commercial Preparations via a Multiplex Approach of GC–MS, UV, and NMR Techniques
Source: MDPI journal article supplement (doi:10.3390/metabo12070614), 2022-07-01
Supplement: s1 [file s1]

# **Supplementary Materials**

**Comparative metabolite profiling and fingerprinting of medicinal cinnamon bark and its commercial preparations *via* a multiplex approach of GC–MS, UV, and NMR techniques**

## Supplementary Tables

**Table S1:** The relative abundances (%  $\pm$  S.E) of a list of detected peaks (126 peaks) following analysis of various cinnamon products by SPME coupled to GC/MS. The peaks were identified based on retention times, reference standards, and Kovat retention index. The samples codes are explained in **Table 1**.

| Peak No.       | RT (min) | Kovat retention index (RI) | Metabolite name                              | Chemical class | Relative abundance (%) ± S.E |           |           |           |           |                              |           |            |           |
|----------------|----------|----------------------------|----------------------------------------------|----------------|------------------------------|-----------|-----------|-----------|-----------|------------------------------|-----------|------------|-----------|
|                |          |                            |                                              |                | Authenticated cinnamon drugs |           |           |           |           | Commercial cinnamon products |           |            |           |
|                |          |                            |                                              |                | CA                           | CI        | CT        | CV        | CVM       | CP-1                         | CP-2      | CP-3       | CP-4      |
| 3              | 2.19     | 515.79                     | Acetic acid                                  | Acids          | 0.03±0.01                    | 0.33±0.22 | 0.07±0.05 | 0.07±0.02 | 0.53±0.46 | 1.12±0.94                    | 0.95±0.42 | 0.44±0.05  | 0.35±0.16 |
| 8              | 6.81     | 969.4                      | Caproic acid                                 |                | 0.03±0.03                    | 0.10±0.07 | 0.14±0.13 | 0.11±0.05 | 0.33±0.21 | 0.32±0.02                    | 0.05±0.2  | 0.06±0.01  | 0.02±0.01 |
| 16             | 8.993    | 1173.45                    | Benzoic acid                                 |                | 0.16±0.12                    | 0.15±0.11 | 0.27±0.23 | 0.52±0.25 | 0.39±0.21 | 0.05±0.0                     | 0.14±0.07 | 0.10±0.01  | 0.16±0.07 |
| 34             | 10.653   | 1344.68                    | Hydrocinnamic acid                           |                | 1.14±1.0                     | 0.02±0.01 | 0.68±0.31 | 0.03±0.01 | 0.03±0.01 | 0.15±0.01                    | ---       | 0.01±0.0   | ---       |
| 54             | 11.488   | 1430.94                    | Cinnamic acid                                |                | 0.26±0.22                    | 0.01±0.01 | 0.03±0.02 | 0.08±0.02 | 0.02±0.01 | 0.20±0.07                    | 0.81±0.42 | 0.01±0.0   | 2.23±0.5  |
| 57             | 11.538   | 1436.26                    | 2-Methoxy phenylacetic acid                  | ---            | ---                          | ---       | ---       | ---       | ---       | 0.01±0.0                     | ---       | 0.01±0.0   |           |
| Total acids    |          |                            |                                              |                | 1.62                         | 0.62      | 1.19      | 0.81      | 1.31      | 1.85                         | 1.95      | 0.62       | 2.77      |
| 1              | 1.781    | 474.73                     | Ethanol                                      | Alcohols       | 0.32±0.05                    | 0.08±0.07 | 0.28±0.27 | 0.02±0.01 | 0.21±0.19 | 0.82±0.62                    | 0.04±0.0  | 0.44±0.04  | 0.11±0.07 |
| 6              | 5.249    | 821.75                     | (Z)-3-Hexen-1-ol                             |                | 0.17±0.12                    | 0.12±0.09 | 0.61±0.59 | 0.18±0.1  | 3.09±1.84 | 30.89±1.7                    | 0.15±0.08 | 23.30±5.08 | 0.02±0.01 |
| 9              | 7.183    | 1004.67                    | 3-Hexen-1-ol isomer                          |                | 1.58±1.55                    | 0.39±0.33 | 4.16±4.12 | 0.49±0.28 | 6.78±3.66 | 11.34±2.96                   | 0.57±0.32 | 29.18±4.3  | 0.02±0.01 |
| 10             | 7.283    | 1014.06                    | Unknown                                      |                | ---                          | ---       | ---       | ---       | 0.06±0.04 | 7.47±1.21                    | ---       | 0.96±0.04  | ---       |
| 15             | 8.46     | 1123.78                    | Phenylethyl alcohol                          |                | 0.07±0.06                    | 0.07±0.04 | 0.51±0.46 | 0.37±0.18 | 0.06±0.02 | 0.34±0.03                    | 0.03±0.01 | 0.25±0.06  | 0.01±0.0  |
| 18             | 9.069    | 1181.04                    | Isoborneol                                   |                | 0.80±0.73                    | 0.07±0.06 | 0.31±0.29 | 0.33±0.16 | 0.36±0.22 | 0.33±0.03                    | 1.68±0.95 | 0.20±0.04  | 1.41±0.66 |
| 19             | 9.295    | 1201.6                     | α-Terpineol                                  |                | 0.16±0.15                    | 0.10±0.09 | 0.25±0.23 | 0.10±0.05 | 0.03±0.02 | 0.15±0.0                     | 0.88±0.5  | 0.05±0.0   | 0.82±0.39 |
| 24             | 9.624    | 1236.85                    | 3-Phenylpropanol                             |                | 0.14±0.07                    | 0.22±0.15 | 0.10±0.04 | 0.02±0.02 | 0.08±0.06 | 0.01±0.0                     | 0.04±0.02 | 0.05±0.01  | 0.02±0.01 |
| 27             | 10.064   | 1283.12                    | Cinnamyl alcohol isomer                      |                | 0.03±0.01                    | 0.27±0.1  | 0.06±0.02 | 0.04±0.04 | 0.07±0.03 | 0.29±0.02                    | 0.01±0.0  | 0.01±0.0   | 0.02±0.02 |
| 30             | 10.266   | 1304.88                    | Cumic alcohol                                |                | 0.21±0.2                     | 0.01±0.0  | 0.19±0.17 | 0.02±0.01 | 0.03±0.01 | 0.11±0.05                    | 2.85±1.6  | 0.03±0.01  | 2.25±0.93 |
| 33             | 10.413   | 1320.03±                   | Cinnamyl alcohol                             |                | 0.30±0.02                    | 1.25±0.69 | 0.09±0.01 | 0.75±0.12 | 0.7±0.29  | 0.69±0.03                    | 0.08±0.02 | 0.33±0.07  | 0.06±0.0  |
| 86             | 13.202   | 1597.09                    | Caryophyllenyl alcohol                       |                | 0.23±0.01                    | 0.06±0.00 | 0.31±0.06 | 0.17±0.02 | 0.07±0.03 | 0.01±0.0                     | 0.21±0.02 | 0.01±0.0   | 0.20±0.03 |
| 88             | 13.283   | 1605.64                    | Axanol                                       |                | 0.2±0.04                     | 0.04±0.0  | 0.05±0.01 | 0.17±0.02 | 0.06±0.02 | 0.02±0.0                     | 0.11±0.01 | 0.01±0.0   | 0.32±0.04 |
| 90             | 13.525   | 1631.82                    | Carotol                                      |                | 0.02±0.0                     | 0.01±0.0  | 0.24±0.05 | 0.03±0.0  | 0.01±0.0  | 0.01±0.0                     | 0.01±0.0  | ---        | 0.02±0.0  |
| 97             | 13.787   | 1661.03                    | Globulol                                     |                | 0.11±0.03                    | 0.17±0.08 | 0.03±0.0  | 0.01±0.0  | 0.05±0.01 | 0.04±0.01                    | 0.01±0.0  | 0.01±0.0   | 0.01±0.0  |
| 100            | 13.852   | 1668.19                    | Epicubenol                                   |                | 0.06±0.01                    | 0.01±0.0  | 0.10±0.03 | 0.01±0.0  | 0.01±0.0  | 0.02±0.0                     | 0.03±0.0  | ---        | 0.03±0.01 |
| 101            | 13.932   | 1677.01                    | α-Cadinol                                    |                | 0.66±0.12                    | 0.06±0.0  | 0.16±0.04 | 0.45±0.05 | 0.34±0.09 | 0.04±0.01                    | 0.34±0.01 | 0.01±0.01  | 0.46±0.08 |
| 102            | 13.94    | 1678.21                    | Daucol                                       |                | 0.47±0.03                    | 0.04±0.0  | 0.06±0.02 | 0.15±0.02 | 0.12±0.03 | 0.03±0.0                     | 0.12±0.01 | 0.01±0.0   | 0.14±0.03 |
| 103            | 14.054   | 1690.47                    | β-Eudesmol                                   |                | 0.12±0.02                    | 0.04±0.01 | 0.08±0.02 | 0.10±0.01 | 0.08±0.02 | 0.04±0.01                    | 0.05±0.0  | 0.01±0.0   | 0.08±0.02 |
| 104            | 14.069   | 1692.63                    | Cubenol isomer                               |                | 0.01±0.0                     | 0.01±0.01 | 0.01±0.0  | 0.01±0.0  | 0.01±0.0  | 0.11±0.01                    | ---       | ---        | 0.01±0.0  |
| 106            | 14.111   | 1696.62                    | β-Bisabolol                                  |                | 0.03±0.01                    | 0.02±0.02 | 0.01±0.0  | 0.02±0.0  | 0.02±0.01 | 0.03±0.01                    | 0.01±0.0  | 0.01±0.0   | 0.01±0.0  |
| 109            | 14.259   | 1712.39                    | α-Bisabolol                                  |                | 0.07±0.01                    | 0.04±0.0  | 0.05±0.01 | 0.02±0.0  | 0.03±0.0  | 0.06±0.0                     | 0.05±0.0  | 0.01±0.0   | 0.02±0.01 |
| 112            | 14.466   | 1735.48                    | 1-Naphthalenol                               |                | 0.10±0.02                    | 0.02±0.0  | 0.01±0.0  | ---       | 0.01±0.0  | 0.01±0.0                     | ---       | ---        | ---       |
| 121            | 15.378   | 1834.66                    | Azulen-2-ol, 1,4-dimethyl-7-(1-methylethyl)- |                | 0.04±0.01                    | 0.01±0.01 | 0.01±0.0  | ---       | ---       | ---                          | ---       | ---        | ---       |
| Total alcohols |          |                            |                                              |                | 5.91                         | 3.12      | 7.69      | 3.45      | 12.28     | 52.85                        | 7.29      | 54.89      | 6.06      |

|                             |        |         |                             |                           |           |            |            |            |           |           |           |            |            |
|-----------------------------|--------|---------|-----------------------------|---------------------------|-----------|------------|------------|------------|-----------|-----------|-----------|------------|------------|
| 7                           | 6.669  | 956.06  | Benzaldehyde                | Aldehydes/<br>Ethers      | 0.35±0.24 | 1.07±0.89  | 1.03±0.93  | 0.46±0.24  | 1.22±0.65 | 1.70±0.09 | 1.76±0.93 | 2.66±0.05  | 0.93±0.44  |
| 11                          | 7.671  | 1050.12 | Salicylaldehyde             |                           | 0.03±0.01 | 0.02±0.01  | 0.05±0.04  | 0.07±0.03  | 0.22±0.11 | 0.13±0.01 | 0.05±0.02 | 0.05±0.0   | 0.04±0.02  |
| 14                          | 8.308  | 1109.66 | Nonanal                     |                           | 0.02±0.0  | 0.05±0.02  | 0.02±0.0   | 0.01±0.0   | 0.54±0.28 | 0.04±0.01 | 0.01±0.0  | 0.04±0.01  | 0.01±0.0   |
| 20                          | 9.372  | 1210.08 | Decanal                     |                           | 0.03±0.02 | 0.03±0.01  | 0.02±0.0   | 0.01±0.0   | 0.07±0.03 | 0.05±0.01 | 0.02±0.01 | 0.04±0.01  | 0.01±0.0   |
| 22                          | 9.597  | 1233.76 | Cis-Cinnamaldehyde          |                           | 0.02±0.01 | 0.29±0.15  | 0.11±0.04  | 0.80±0.3   | 0.22±0.07 | 0.03±0.0  | 0.43±0.18 | 0.07±0.02  | 1.23±0.32  |
| 25                          | 9.811  | 1257.14 | O-Anisaldehyde              |                           | 0.45±0.36 | 0.03±0.02  | 0.11±0.04  | 0.15±0.07  | 0.04±0.02 | 0.10±0.02 | 0.13±0.07 | 0.03±0.0   | 0.01±0.0   |
| 26                          | 9.946  | 1270.59 | p-Anisaldehyde              |                           | 0.05±0.03 | 0.45±0.35  | 0.15±0.02  | 0.03±0.0   | 0.04±0.01 | 0.04±0.01 | 0.02±0.0  | 0.03±0.0   | 0.01±0.01  |
| 28                          | 10.195 | 1298.31 | (E)-Cinnamaldehyde          |                           | 4.16±0.47 | 48.51±4.85 | 35.09±5.28 | 55.63±4.34 | 60.88±6.3 | 6.31±0.74 | 64.6±5.98 | 21.93±9.81 | 47.94±2.55 |
| 31                          | 10.28  | 1306.96 | Safrole                     |                           | 0.02±0.01 | 0.05±0.02  | 0.05±0.02  | 0.10±0.04  | 0.06±0.01 | 0.13±0.07 | 0.08±0.02 | 0.03±0.0   | ---        |
| 36                          | 10.734 | 1353.31 | Piperonal                   |                           | 0.34±0.2  | 0.02±0.01  | 0.03±0.01  | 0.01±0.0   | 0.01±0.0  | 0.06±0.01 | 0.06±0.03 | 0.03±0.01  | 0.09±0.07  |
| 41                          | 10.893 | 1370.88 | Eugenol                     |                           | 0.04±0.01 | 4.66±2.0   | 0.17±0.05  | 0.55±0.14  | 0.02±0.01 | 0.02±0.0  | 0.02±0.01 | 0.01±0.0   | 0.01±0.0   |
| 43                          | 10.975 | 1379.1  | Cerulignol                  |                           | ---       | 0.64±0.52  | 0.04±0.01  | ---        | ---       | ---       | ---       | ---        | ---        |
| 53                          | 11.29  | 1411.28 | Vanillin                    |                           | 0.02±0.01 | 0.01±0.01  | 0.02±0.01  | 0.10±0.05  | 0.06±0.03 | 0.04±0.02 | 0.08±0.04 | 0.01±0.0   | 0.20±0.05  |
| 73                          | 12.454 | 1524.38 | Acetisoeugenol              |                           | 0.02±0.01 | 0.02±0.01  | 0.09±0.02  | ---        | 0.02±0.02 | ---       | 0.02±0.0  | 0.01±0.0   | ---        |
| 77                          | 12.572 | 1536.24 | O-Methoxy cinnamaldehyde    |                           | 0.63±0.2  | 2.40±0.77  | 0.32±0.06  | 9.57±1.05  | 8.48±1.82 | 0.55±0.11 | 0.84±0.12 | 0.22±0.03  | 2.17±0.25  |
| 80                          | 12.752 | 1553.26 | β-Asarone                   |                           | 0.01±0.01 | 0.02±0.0   | ---        | 0.01±0.0   | ---       | 0.07±0.0  | ---       | ---        | ---        |
| 84                          | 13.153 | 1592.48 | 1,5-Epoxysalvial-4(14)-ene  |                           | 0.79±0.21 | 0.08±0.03  | 0.11±0.02  | 0.02±0.0   | ---       | 0.03±0.0  | 0.03±0.01 | 0.02±0.0   | 0.07±0.01  |
| 95                          | 13.694 | 1651.2  | Apiol                       |                           | 0.02±0.01 | 0.01±0.0   | 0.01±0.0   | 0.06±0.01  | 0.01±0.0  | 0.01±0.0  | 0.01±0.0  | ---        | 0.02±0.0   |
| 99                          | 13.827 | 1665.6  | Unknown                     | 0.03±0.01                 | 0.51±0.32 | 0.03±0.0   | 0.02±0.0   | 0.02±0.0   | 0.40±0.08 | 0.02±0.01 | 0.16±0.04 | 0.02±0.0   |            |
| 114                         | 14.611 | 1751.89 | Ylangenal                   | 0.01±0.0                  | 0.01±0.01 | 0.01±0.01  | 0.01±0.0   | 0.01±0.0   | 0.08±0.01 | 0.01±0.0  | 0.01±0.01 | ---        |            |
| 117                         | 14.965 | 1790.56 | Unknown                     | 0.83±0.17                 | 0.05±0.02 | 0.07±0.02  | 0.04±0.0   | 0.22±0.05  | 0.30±0.01 | 0.02±0.0  | 0.02±0.01 | 0.02±0.0   |            |
| Total aldehyde/ether        |        |         |                             |                           | 7.88      | 58.94      | 37.52      | 67.65      | 72.13     | 10.09     | 68.20     | 25.37      | 52.79      |
| 87                          | 13.226 | 1599.47 | Hexadecane                  | Aliphatic<br>hydrocarbons | 0.34±0.12 | 0.73±0.22  | 0.05±0.01  | 0.18±0.02  | 0.03±0.01 | 0.12±0.01 | 0.02±0.0  | 0.03±0.0   | 0.01±0.0   |
| 119                         | 15.036 | 1798.62 | Octadecane                  |                           | 0.15±0.02 | 0.18±0.03  | 0.02±0.01  | 0.07±0.01  | 0.01±0.01 | 0.03±0.0  | 0.01±0.0  | 0.01±0.0   | ---        |
| Total aliphatic hydrocarbon |        |         |                             |                           | 0.48      | 0.91       | 0.07       | 0.24       | 0.04      | 0.15      | 0.03      | 0.04       | 0.02       |
| 49                          | 11.157 | 1398.68 | β-Vinylnaphthalene          | Aromatic<br>hydrocarbons  | 0.02±0.0  | 0.76±0.25  | 0.01±0.01  | 0.01±0.0   | 0.01±0.01 | 0.02±0.01 | 0.01±0.0  | 0.01±0.0   | 0.01±0.0   |
| 72                          | 12.355 | 1515.12 | Unknown                     |                           | 8.84±2.89 | 6.81±2.63  | 0.09±0.02  | 0.03±0.01  | ---       | 0.03±0.0  | 0.01±0.0  | ---        | 0.19±0.16  |
| 89                          | 13.348 | 1612.72 | unknown                     |                           | 0.09±0.05 | 5.95±2.45  | 0.29±0.11  | 0.04±0.01  | 0.02±0.01 | 0.05±0.03 | 0.01±0.0  | 0.01±0.0   | 0.01±0.01  |
| 93                          | 13.618 | 1642.89 | Naphthalene                 |                           | 0.02±0.01 | ---        | 0.01±0.0   | 0.02±0.0   | 0.01±0.0  | 0.01±0.0  | 0.01±0.0  | ---        | 0.02±0.0   |
| 96                          | 13.725 | 1654.21 | α-Corocalene                |                           | 0.10±0.01 | 0.01±0.01  | 0.06±0.01  | 0.22±0.02  | 0.03±0.01 | 0.03±0.0  | 0.13±0.01 | 0.01±0.0   | 0.26±0.04  |
| 108                         | 14.229 | 1709.72 | Cadalene                    |                           | 1.03±0.24 | 0.10±0.04  | 0.36±0.1   | 0.77±0.1   | 0.15±0.03 | 0.13±0.0  | 1.75±0.24 | 0.02±0.01  | 0.88±0.17  |
| 120                         | 15.146 | 1810.14 | Anthracene                  |                           | 0.22±0.12 | 1.41±0.59  | 0.34±0.12  | 0.09±0.02  | 0.04±0.03 | 0.02±0.01 | 0.03±0.01 | ---        | 0.04±0.01  |
| Total aromatic hydrocarbon  |        |         |                             |                           | 10.33     | 15.04      | 1.15       | 1.16       | 0.28      | 0.30      | 1.96      | 0.05       | 1.41       |
| 2                           | 1.928  | 489.66  | Ethyl acetate               | Esters                    | 0.80±0.77 | 0.16±0.15  | 0.28±0.28  | 0.24±0.1   | 0.20±0.19 | 0.24±0.04 | 0.19±0.0  | 0.99±0.44  | 0.28±0.14  |
| 17                          | 9.032  | 1178.45 | Unknown                     |                           | 6.55±5.68 | 0.13±0.05  | 5.44±2.55  | 1.18±0.34  | 0.33±0.07 | 2.01±0.4  | 0.12±0.04 | 0.11±0.02  | 0.21±0.07  |
| 35                          | 10.664 | 1346.47 | Salicylic acid methyl ether |                           | 0.40±0.21 | 0.02±0.01  | 0.16±0.07  | 0.01±0.0   | 0.04±0.03 | 0.06±0.02 | ---       | 0.03±0.01  | ---        |
| 37                          | 10.735 | 1354.69 | Cinnamyl formate            |                           | 0.28±0.27 | 0.01±0.0   | ---        | 0.01±0.01  | 0.01±0.0  | 0.01±0.0  | 0.03±0.02 | ---        | 0.05±0.03  |
| 40                          | 10.797 | 1360.5  | Ethyl dihydrocinnamate      |                           | 1.34±1.0  | 0.01±0.0   | 0.05±0.0   | 0.03±0.01  | 0.01±0.0  | 0.01±0.0  | 0.01±0.0  | 0.01±0.0   | 0.01±0.0   |
| 44                          | 10.994 | 1381.08 | Hydrocinnamyl isobutyrate   |                           | 0.10±0.06 | 0.18±0.12  | 0.02±0.01  | 0.04±0.01  | 0.06±0.03 | 0.02±0.0  | 0.03±0.01 | 0.02±0.01  | 0.02±0.01  |

|                |        |         |                                |               |             |           |            |           |           |           |            |           |           |
|----------------|--------|---------|--------------------------------|---------------|-------------|-----------|------------|-----------|-----------|-----------|------------|-----------|-----------|
| 45             | 11.012 | 1383.24 | Unknown                        |               | 0.10±0.05   | 0.31±0.25 | 0.12±0.08  | 0.30±0.1  | 0.10±0.04 | 0.27±0.12 | 0.04±0.02  | 0.12±0.05 | 0.16±0.02 |
| 60             | 11.652 | 1446.65 | Cinnamyl acetate               |               | 0.03±0.01   | 0.93±0.2  | 0.45±0.09  | 0.06±0.01 | 0.02±0.0  | 0.03±0.01 | 0.23±0.04  | 0.05±0.01 | 0.07±0.01 |
| 62             | 11.769 | 1458.04 | Dimethyl phthalate             |               | 0.07±0.03   | 0.08±0.01 | 0.10±0.01  | 0.09±0.02 | 0.18±0.07 | 0.71±0.04 | 0.05±0.0   | 0.50±0.11 | 0.04±0.0  |
| 63             | 11.871 | 1467.88 | (E)-Ethyl cinnamate            |               | 2.12±0.15   | 0.04±0.0  | 0.13±0.02  | 0.11±0.05 | 0.03±0.02 | 0.11±0.02 | 0.01±0.0   | 0.02±0.0  | 0.07±0.01 |
| 81             | 12.827 | 1561.1  | Ethyl O-hydroxy hydrocinnamate |               | 0.03±0.01   | 0.01±0.01 | 0.02±0.0   | 0.04±0.0  | 0.03±0.01 | 0.05±0.0  | 0.04±0.0   | 0.01±0.0  | 0.03±0.01 |
| 82             | 13.005 | 1577.51 | Ethyl melilotate               |               | 0.43±0.13   | 0.01±0.0  | 0.01±0.0   | ---       | ---       | 0.01±0.01 | 0.02±0.0   | ---       | 0.02±0.01 |
| 85             | 13.159 | 1592.9  | Ethyl dodecanoate              |               | 0.73±0.13   | ---       | 0.03±0.01  | 0.03±0.0  | ---       | 0.01±0.0  | ---        | ---       | ---       |
| 107            | 14.203 | 1706.76 | Ethyl tridecanoate             |               | 0.26±0.03   | 0.01±0.0  | 0.02±0.0   | 0.02±0.0  | ---       | ---       | 0.01±0.0   | ---       | 0.01±0.0  |
| 115            | 14.839 | 1776.66 | Ethyl 9-tetradecenoate         |               | 0.02±0.01   | 0.05±0.03 | 0.03±0.02  | ---       | 0.01±0.0  | 0.03±0.01 | ---        | 0.01±0.01 | 0.02±0.01 |
| 116            | 14.914 | 1785.1  | Benzyl benzoate                |               | 0.23±0.05   | 0.85±0.38 | 0.16±0.03  | 0.14±0.0  | 0.29±0.09 | 0.04±0.02 | 0.09±0.02  | 0.03±0.02 | 0.12±0.01 |
| 118            | 14.991 | 1793.3  | Ethyl myristate                |               | 1.40±0.3    | 0.02±0.01 | 0.05±0.01  | 0.05±0.01 | ---       | 0.01±0.0  | ---        | ---       | ---       |
| 122            | 15.871 | 1885.58 | ethyl pentadecanoate           |               | 0.57±0.15   | 0.02±0.01 | 0.02±0.0   | 0.03±0.0  | ---       | ---       | ---        | ---       | ---       |
| 123            | 16.173 | 1917.13 | Methyl palmitate               |               | 0.02±0.01   | 0.07±0.04 | 0.01±0.01  | 0.01±0.0  | 0.15±0.09 | 0.04±0.04 | 0.29±0.16  | ---       | 0.24±0.06 |
| 124            | 16.655 | 1967.6  | Ethyl 9-hexadecenoate          |               | 0.18±0.06   | 0.22±0.13 | 0.01±0.01  | 0.01±0.0  | 0.54±0.34 | 0.02±0.02 | 0.01±0.0   | ---       | 0.01±0.0  |
| 125            | 16.889 | 1991.48 | Ethyl palmitate                |               | 7.70±2.26   | 0.01±0.0  | 0.08±0.08  | 0.28±0.05 | ---       | ---       | ---        | ---       | 0.02±0.01 |
| 126            | 18.19  | 2123.07 | Ethyl heptadecanoate           |               | 0.13±0.04   | 0.01±0.0  | ---        | 0.01±0.0  | ---       | ---       | ---        | ---       | ---       |
| Total esters   |        |         |                                |               | 23.49       | 3.16      | 7.20       | 2.70      | 2.00      | 3.68      | 1.17       | 1.90      | 1.38      |
| 4              | 2.743  | 571.44  | Acetol                         | Ketones       | ---         | 0.01±0.0  | ---        | ---       | 0.03±0.02 | 0.19±0.11 | 0.01±0.0   | 1.59±0.18 | ---       |
| 12             | 7.947  | 1075.8  | Acetophenone                   |               | 0.22±0.18   | 0.09±0.04 | 0.20±0.19  | 0.08±0.04 | 0.20±0.1  | 0.77±0.05 | 0.24±0.13  | 0.49±0.04 | 0.09±0.04 |
| 39             | 10.794 | 1360.12 | Piperitenone                   |               | 0.01±0.01   | 0.02±0.01 | ---        | 0.04±0.02 | 0.04±0.03 | ---       | 0.02±0.01  | ---       | 0.07±0.03 |
| 92             | 13.58  | 1639.12 | Acorenone B                    |               | 0.01±0.0    | 0.22±0.09 | 0.01±0.0   | ---       | ---       | 0.01±0.0  | ---        | ---       | ---       |
| 105            | 14.075 | 1692.67 | aR-Turmerone                   |               | 0.04±0.01   | 0.04±0.02 | 0.15±0.04  | 0.07±0.01 | 0.02±0.0  | 0.02±0.01 | 0.03±0.0   | 0.02±0.0  | 0.04±0.01 |
| 110            | 14.262 | 1713.42 | Mustakone.                     |               | 0.03±0.01   | 0.09±0.08 | 0.01±0.0   | 0.02±0.0  | 0.02±0.0  | 0.02±0.0  | 0.02±0.0   | ---       | 0.01±0.0  |
| Total ketones  |        |         |                                |               | 0.31        | 0.46      | 0.37       | 0.22      | 0.31      | 1.00      | 0.32       | 2.10      | 0.22      |
| 42             | 10.93  | 1374.5  | Prunolide.                     | Lactones      | 0.02±0.01   | 0.05±0.02 | 0.06±0.01  | 0.01±0.0  | 0.05±0.02 | 0.09±0.0  | 0.01±0.0   | 0.05±0.01 | 0.01±0.0  |
| 50             | 11.203 | 1402.34 | Hydrocoumarin.                 |               | 0.01±0.01   | 0.01±0.0  | ---        | 0.01±0.0  | 0.01±0.0  | 0.16±0.15 | 0.02±0.01  | 6.37±0.27 | 0.17±0.07 |
| 61             | 11.734 | 1454.57 | Coumarin                       |               | 44.76±10.74 | 1.19±0.41 | 39.56±9.47 | 6.76±0.65 | 7.97±2.34 | 19.11±1.0 | 11.41±1.95 | 3.30±0.04 | 9.22±1.81 |
| Total lactones |        |         |                                |               | 44.79       | 1.24      | 39.62      | 6.78      | 8.04      | 19.36     | 11.43      | 9.71      | 9.40      |
| 68             | 12.107 | 1490.88 | Cis-4,10-Epoxyamorphane        | Oxides        | 0.06±0.02   | ---       | 0.06±0.01  | 0.17±0.04 | 0.02±0.01 | 0.01±0.0  | 0.10±0.03  | 0.02±0.0  | 0.10±0.01 |
| 69             | 12.203 | 1500.35 | 10,11-Epoxycalamenene          |               | 0.07±0.02   | 0.02±0.02 | 0.04±0.01  | 0.25±0.05 | 0.03±0.01 | 0.01±0.0  | 0.12±0.04  | 0.01±0.0  | 0.20±0.01 |
| 98             | 13.811 | 1663.51 | Caryophyllene oxide            |               | 0.43±0.07   | 0.05±0.0  | 0.14±0.03  | 0.34±0.03 | 0.17±0.06 | 0.14±0.01 | 0.35±0.0   | 0.01±0.0  | 0.95±0.16 |
| Total oxides   |        |         |                                |               | 0.55        | 0.08      | 0.24       | 0.76      | 0.23      | 0.16      | 0.58       | 0.04      | 1.25      |
| 21             | 9.484  | 1221.7  | Pyroguaiac acid                | Phenols       | 0.01±0.0    | 0.01±0.01 | 0.01±0.0   | ---       | 0.03±0.01 | 0.01±0.0  | 0.01±0.0   | 0.02±0.0  | 0.01±0.0  |
| 29             | 10.211 | 1299.38 | Carvacrol                      |               | 0.01±0.0    | 0.05±0.03 | 0.74±0.71  | 3.90±1.95 | 0.02±0.01 | 0.23±0.18 | 0.02±0.01  | 0.01±0.0  | 3.76±1.87 |
| 32             | 10.321 | 1310.25 | Thymol                         |               | 0.05±0.02   | 0.04±0.02 | 0.18±0.05  | 0.19±0.11 | 0.01±0.0  | 0.08±0.0  | 0.29±0.13  | 0.01±0.0  | 0.01±0.0  |
| 83             | 13.077 | 1583.64 | 5-Hydroxycalamenene            |               | 0.03±0.0    | 0.01±0.01 | 0.06±0.01  | 0.02±0.0  | ---       | 0.01±0.0  | 0.03±0.0   | ---       | 0.06±0.01 |
| 113            | 14.563 | 1746.65 | Unknown                        |               | 0.15±0.04   | 0.01±0.01 | 0.08±0.02  | 0.08±0.01 | 0.07±0.01 | 0.07±0.01 | 0.07±0.01  | 0.01±0.0  | 0.09±0.02 |
| Total phenols  |        |         |                                |               | 0.24        | 0.12      | 1.06       | 4.19      | 0.12      | 0.41      | 0.42       | 0.05      | 3.92      |
| 5              | 4.953  | 793.12  | Furfural                       | Pyrans/furans | 0.01±0.01   | 0.09±0.04 | 0.13±0.08  | 0.01±0.0  | 0.08±0.03 | 1.07±0.09 | 0.02±0.0   | 4.67±0.82 | 0.01±0.0  |
| 13             | 8.025  | 1083.19 | Dihydro-3-methylene-5-         |               | 0.02±0.02   | 0.02±0.02 | 0.46±0.41  | 0.14±0.07 | 0.04±0.02 | 2.86±0.34 | 0.02±0.01  | 0.12±0.02 | 0.01±0.0  |

|                                 |        |         | methyl-2-furanone                                  |                            |           |           |           |           |           |           |           |           |           |
|---------------------------------|--------|---------|----------------------------------------------------|----------------------------|-----------|-----------|-----------|-----------|-----------|-----------|-----------|-----------|-----------|
| 23                              | 9.611  | 1235.57 | 5-Hydroxymethylfurfural                            |                            | 0.04±0.03 | 0.01±0.0  | 0.02±0.01 | ---       | ---       | 0.01±0.0  | 0.01±0.0  | ---       | 0.01±0.01 |
| 46                              | 11.039 | 1386.16 | 2(3 <i>H</i> )-Furanone, 3-acetyldihydro-3-methyl- |                            | 0.04±0.02 | 0.04±0.02 | ---       | ---       | 0.03±0.01 | 0.04±0.01 | ---       | 0.03±0.0  | 0.01±0.0  |
| Total pyran/furan               |        |         |                                                    |                            | 0.11      | 0.16      | 0.61      | 0.15      | 0.16      | 3.98      | 0.05      | 4.82      | 0.03      |
| 38                              | 10.779 | 1358.17 | Cadina-3,5-diene                                   | Sesquiterpene hydrocarbons | 0.11±0.07 | ---       | ---       | 0.01±0.01 | 0.01±0.0  | ---       | ---       | 0.01±0.0  | 0.01±0.0  |
| 47                              | 11.104 | 1392.35 | Cyclosativene.                                     |                            | 0.39±0.36 | 0.040.02  | 0.01±0.0  | 0.05±0.02 | 0.04±0.02 | 0.03±0.0  | 0.40±0.23 | 0.03±0.01 | 0.41±0.3  |
| 48                              | 11.13  | 1396.44 | Copaene                                            |                            | 0.12±0.06 | 0.04±0.02 | 0.01±0.0  | 0.01±0.0  | 0.02±0.0  | 0.04±0.0  | ---       | 0.05±0.01 | ---       |
| 51                              | 11.259 | 1408.53 | β-Elementene.                                      |                            | 0.01±0.0  | 0.11±0.06 | 0.01±0.0  | 0.03±0.01 | ---       | 0.06±0.0  | 0.01±0.0  | 0.01±0.0  | ---       |
| 52                              | 11.287 | 1411.6  | (+)-Sativen                                        |                            | 0.02±0.01 | 0.13±0.05 | 0.18±0.05 | 0.03±0.0  | 0.12±0.07 | 0.62±0.11 | 0.02±0.0  | 0.06±0.01 | 0.01±0.0  |
| 55                              | 11.495 | 1431.48 | Isosativene.                                       |                            | 0.03±0.03 | 0.19±0.1  | 0.01±0.01 | ---       | 0.01±0.0  | 0.02±0.02 | 0.02±0.01 | 0.01±0.0  | ---       |
| 56                              | 11.508 | 1432.57 | Himachalene-1,4-diene                              |                            | 1.18±0.58 | 0.02±0.02 | 1.11±0.59 | 0.07±0.04 | 0.08±0.04 | 4.97±1.31 | 0.22±0.05 | 0.02±0.01 | 0.05±0.02 |
| 58                              | 11.559 | 1437.46 | Caryophyllene                                      |                            | 0.01±0.0  | 0.09±0.06 | 0.02±0.01 | 0.10±0.03 | 0.04±0.02 | 0.01±0.0  | 0.37±0.18 | ---       | 2.47±0.18 |
| 59                              | 11.631 | 1444.43 | <i>trans</i> -α-Bergamotene                        |                            | 0.07±0.07 | 0.01±0.0  | 0.01±0.0  | 0.08±0.03 | 0.07±0.04 | 0.01±0.0  | 0.09±0.05 | ---       | 0.53±0.18 |
| 64                              | 11.887 | 1469.19 | Humulene                                           |                            | 0.01±0.0  | 0.01±0.0  | 0.01±0.0  | 0.07±0.02 | 0.01±0.01 | ---       | 0.04±0.02 | ---       | 0.19±0.02 |
| 65                              | 11.973 | 1477.83 | 4- <i>epi</i> -α-Acoradiene                        |                            | 0.03±0.01 | 0.01±0.0  | 0.01±0.0  | ---       | ---       | 0.01±0.0  | 0.09±0.03 | ---       | 0.10±0.01 |
| 66                              | 12.042 | 1483.63 | γ-Muurolene                                        |                            | 0.14±0.05 | 0.11±0.06 | 0.10±0.03 | 1.08±0.66 | 0.34±0.2  | 0.02±0.01 | 0.82±0.31 | 0.01±0.0  | 3.33±0.16 |
| 67                              | 12.096 | 1489.21 | α-Amorphene                                        |                            | 0.03±0.01 | 0.05±0.03 | 0.02±0.0  | 0.02±0.01 | 0.02±0.0  | 0.09±0.01 | 0.02±0.01 | 0.05±0.0  | 0.06±0.0  |
| 70                              | 12.211 | 1500.79 | α-Selinene                                         |                            | 0.02±0.01 | 5.21±1.11 | 0.06±0.02 | 0.01±0.0  | ---       | 0.02±0.01 | ---       | ---       | 0.01±0.0  |
| 71                              | 12.29  | 1508.54 | α-Muurolene                                        |                            | 0.62±0.18 | 0.04±0.01 | 0.54±0.13 | 4.94±0.65 | 0.75±0.42 | 0.02±0.0  | 2.68±0.78 | 0.02±0.0  | 5.59±0.48 |
| 74                              | 12.465 | 1525.5  | γ-Cadinene                                         |                            | 0.09±0.06 | 0.14±0.08 | 0.05±0.01 | 0.59±0.1  | 0.07±0.04 | 0.01±0.0  | 0.17±0.04 | 0.02±0.1  | 0.54±0.02 |
| 75                              | 12.533 | 1531.85 | δ-Cadinene                                         |                            | 0.31±0.08 | 0.25±0.14 | 0.30±0.06 | 3.47±0.48 | 1.21±0.32 | 0.05±0.02 | 1.36±0.33 | 0.03±0.0  | 6.63±0.69 |
| 76                              | 12.551 | 1534.16 | <i>trans</i> -Calamenene                           |                            | 0.19±0.12 | 9.07±3.35 | 0.60±0.23 | 0.08±0.02 | 0.05±0.02 | 0.10±0.05 | 0.02±0.0  | 0.03±0.01 | 0.02±0.02 |
| 78                              | 12.664 | 1544.73 | Cubenene                                           |                            | 0.13±0.04 | 0.03±0.0  | 0.09±0.02 | 0.82±0.11 | 0.14±0.06 | ---       | 0.01±0.0  | ---       | 0.07±0.0  |
| 79                              | 12.725 | 1550.73 | α-Dehydro-ar-himachalene                           |                            | 0.10±0.01 | 0.02±0.01 | 0.05±0.01 | 0.34±0.04 | 0.07±0.03 | 0.06±0.0  | 0.16±0.03 | 0.01±0.0  | 0.59±0.05 |
| 91                              | 13.563 | 1636.47 | Clovene                                            |                            | 0.01±0.0  | 0.12±0.05 | 0.02±0.0  | ---       | ---       | 0.01±0.0  | ---       | ---       | ---       |
| 94                              | 13.635 | 1644.33 | δ-Cadinene                                         |                            | 0.06±0.01 | 0.02±0.01 | 0.03±0.01 | 0.05±0.0  | 0.02±0.0  | 0.01±0.0  | 0.04±0.0  | ---       | 0.06±0.01 |
| 111                             | 14.383 | 1726.68 | Selina-3,7(11)-diene                               |                            | 0.56±0.01 | 0.44±0.03 | 0.01±0.0  | ---       | 0.01±0.0  | 0.02±0.0  | ---       | 0.04±0.02 | ---       |
| Total sesquiterpene hydrocarbon |        |         |                                                    |                            | 4.23      | 16.15     | 3.24      | 11.86     | 3.09      | 6.17      | 6.55      | 0.41      | 20.65     |

**Table S2:** Resonance assignments with chemical shifts ( $\delta$ , ppm) of constituents identified in 600 MHz  $^1\text{H}$ ,  $^{13}\text{C}$ , COSY, and HMBC NMR spectra of different authenticated (e.g., CA, CI, and CV) and commercial (e.g., CP-1, CP-2, CP-3, and CP-4) cinnamon samples. The sample codes are listed in **Table 1**.

| No. | Metabolite                 | Assignment                               | $\delta^1\text{H}$ (ppm)    | $\delta^{13}\text{C}$ in HSQC (ppm) | COSY correlation $\delta^1\text{H}$ (ppm)                                     | HMBC correlation $\delta^{13}\text{C}$ (ppm)                                                                             | Cinnamon samples                   |
|-----|----------------------------|------------------------------------------|-----------------------------|-------------------------------------|-------------------------------------------------------------------------------|--------------------------------------------------------------------------------------------------------------------------|------------------------------------|
| N1  | Fatty acids ( $\omega$ -6) | C-1                                      | -                           | 177.6                               | -                                                                             | -                                                                                                                        | CV, CA, CI, CP-1, CP-2, CP-3, CP-4 |
|     |                            | C-2                                      | 2.27 (t, $J=7.2$ Hz)        | 34.8                                | 1.59 (H-3)                                                                    | C-1 (177.6), C-3 (25.9), $(\text{CH}_2)_n$ (30.2)                                                                        |                                    |
|     |                            | C-3                                      | 1.59 (m)                    | 25.9                                | 2.27 (H-2), 1.32 ( $\text{CH}_2$ )                                            | C-1 (177.6), C-2 (34.8), $(\text{CH}_2)_n$ (30.2)                                                                        |                                    |
|     |                            | H-8/H-14 allylic $\text{CH}_2$           | 2.02-2.07 (m)               | 27.9                                | 1.32 $(\text{CH}_2)_n$ , 5.34 (olefinic Hs)                                   | 129.9 (olefinic C), 30.2 $(\text{CH}_2)_n$                                                                               |                                    |
|     |                            | H-11 <i>bis</i> allylic                  | 2.77 (t, $J=6.6$ Hz)        | -                                   | 5.34 (olefinic Hs)                                                            | 129.9 (olefinic C)                                                                                                       |                                    |
|     |                            | olefinic Hs                              | 5.34 (m)                    | 129.9                               | 2.77 ( <i>bis</i> allylic $\text{CH}_2$ ), 2.02-2.07 (allylic $\text{CH}_2$ ) | 27.9 (allylic $\text{CH}_2$ )                                                                                            |                                    |
|     |                            | $(\text{CH}_2)_n$                        | 1.32 (br. S)                | 30.2                                | 0.89 ( $\omega$ -1), 1.59 (H-3), 2.02-2.07 (allylic $\text{CH}_2$ )           | 129.9 (olefinic C), 30.2 $(\text{CH}_2)_n$ , 34.8 (C-2), 25.9 (C-3), 27.9 (allylic C), 14.3 ( <i>t</i> - $\text{CH}_3$ ) |                                    |
| N2  | Glycerol                   | $\omega$ -1 ( <i>t</i> - $\text{CH}_3$ ) | 0.89 (t, $J=7.2$ Hz)        | 14.3                                | 1.32 $(\text{CH}_2)_n$                                                        | 23.6 ( $\omega$ -2), 32.9 ( $\omega$ -3)                                                                                 | CV, CA, CI, CP-2, CP-4             |
|     |                            | C-1/3                                    | 3.5 (dd, $J=11.4, 6$ Hz)    | 64.3                                | -                                                                             | 64.3 (C-3), 73.7 (C-2)                                                                                                   |                                    |
|     |                            | C-1/3                                    | 3.58 (dd, $J=11.4, 4.8$ Hz) | 64.3                                | -                                                                             | 64.3 (C-3), 73.7 (C-2)                                                                                                   |                                    |
| N3  | $\beta$ -glucose           | C-2                                      | 3.64 (m)                    | 73.7                                | -                                                                             | 64.3 (C-1/3)                                                                                                             | CV, CA, CI, CP-1, CP-2, CP-3, CP-4 |
|     |                            | C-1                                      | 4.46 (d, $J=7.8$ Hz)        | 98.1                                | 3.11 (H-2)                                                                    | 76.1 (C-2)                                                                                                               |                                    |
|     |                            | C-2                                      | 3.11 (dd, $J=9, 7.8$ Hz)    | 76.1                                | 4.46 (H-1), 3.35 (H-3)                                                        | 98.1 (C-1), 78.0 (C-3)                                                                                                   |                                    |
| N4  | $\alpha$ -glucose          | C-1                                      | 5.09 (d, $J=3.6$ Hz)        | 94.2                                | 3.34 (H-2)                                                                    | 73.7 (C-2)                                                                                                               | CV, CA, CI, CP-1, CP-2, CP-4       |
|     |                            | C-2                                      | 3.34 (dd, $J=3.6, 9.6$ Hz)  | 73.7                                | 5.09 (H-1)                                                                    | -                                                                                                                        |                                    |

|     |                            |                  |                              |       |                        |                           |                              |
|-----|----------------------------|------------------|------------------------------|-------|------------------------|---------------------------|------------------------------|
| N5  | Fructose                   | C-5              | 4.01 (dd, $J=1.2$ , 12.6 Hz) | 64.3  | 3.57 (H-4)             | 71.1                      | CV, CA, CI, CP-1, CP-2, CP-4 |
| N6  | Sucrose                    | C-1              | 5.14 (d, $J=3$ Hz)           | 93.9  | 3.4 (H-2)              | 74.7 (C-2)                | CA, CI, CP-1                 |
|     |                            | C-2              | 3.4 (dd, $J=3.6$ , 9.6 Hz)   | 74.7  | 5.14 (H-1), 3.8 (m)    | -                         |                              |
|     |                            | C-3,4,6          | 3.8 (m)                      | 73.7  | 3.4 (H-2)              | -                         |                              |
|     |                            | C-5              | 3.49 (td, $J=9$ , 1.8 Hz)    | -     | -                      | -                         |                              |
| N7  | (Z)-Cinnamic acid          | C-1              | -                            | 163.7 | -                      | -                         | CV, CA, CI, CP-1, CP-2, CP-4 |
|     |                            | C-2              | 6.42 (d, $J=9.6$ Hz)         | 116.9 | 7.94 (H-3)             | 163.7 (C-1)               |                              |
|     |                            | C-3              | 7.94 (d, $J=9.6$ Hz)         | 145.5 | 6.42 (H-2)             | 163.7 (C-1), 116.9 (C-2), |                              |
| N8  | (E)-Cinnamic acid          | C-1              | -                            | 170.3 | -                      | -                         | CV, CA, CI, CP-1, CP-2, CP-4 |
|     |                            | C-2              | 6.47 (d, $J=15.6$ Hz)        | 119.4 | 7.63 (H-3)             | 170.3 (C-1), 146 (C-3)    |                              |
|     |                            | C-3              | 7.63 (d, $J=15.6$ Hz)        | 146   | 6.47 (H-2)             | 170.3 (C-1)               |                              |
|     |                            | C-4              | -                            | 133.1 | -                      | -                         |                              |
|     |                            | C-5,9            | 7.63 (dd, $J=7.8$ , 1.2 Hz)  | -     | -                      | 146 (C-3), 133.1 (C-4)    |                              |
| N9  | (E)-Cinnamaldehyde         | C-1              | 9.67 d ( $J=7.8$ Hz)         | 195.9 | 6.78(H-2)              | 129.3 (C-2)               | CV, CA, CI, CP-1, CP-2, CP-4 |
|     |                            | C-2              | 6.78 (dd, $J=15.6$ , 7.8 Hz) | 129.3 | 7.68 (H-3), 9.67 (H-1) | 151.9 (C-3), 134.1 (C-4)  |                              |
|     |                            | C-3              | 7.68 (d, $J=15.6$ Hz)        | 151.9 | 6.78 (H-2)             | 195.9 (C-1), 129.3 (C-2)  |                              |
|     |                            | C-4              | -                            | 134.1 | -                      | -                         |                              |
|     |                            | C-5,9            | 7.67 (dd, $J=8.4$ , 2.4 Hz)  | 129.6 | 7.45 (H-6,7,8)         | -                         |                              |
|     |                            | C-7              | 7.45 (m)                     | nd    | 7.67 (H-5,9)           | -                         |                              |
| N10 | (E)-Methoxy cinnamaldehyde | C-6,8            | 7.45(m)                      | 129.9 | 7.67 (H-5,9)           | -                         | CV                           |
|     |                            | C-1              | 9.62 (d, $J=7.8$ Hz)         | -     | -                      | -                         |                              |
|     |                            | C-2              | 6.82 (dd, $J=16$ , 7.8 Hz)   | -     | -                      | -                         |                              |
|     |                            | C-3              | 7.93 (d, $J=16$ Hz)          | -     | -                      | -                         |                              |
|     |                            | OCH <sub>3</sub> | 3.84 (s)                     | -     | -                      | -                         |                              |

|     |                                |                  |                                  |       |                        |                                                                  |                          |
|-----|--------------------------------|------------------|----------------------------------|-------|------------------------|------------------------------------------------------------------|--------------------------|
| N11 | Cinnamaldehyde dimethyl acetal | C-1              | 4.92 (dd, $J=5.4, 1.2$ Hz)       | 104.6 | 6.14 (H-2)             | 53.1 (OCH <sub>3</sub> )                                         | CV, CA, CI               |
|     |                                | C-2              | 6.14 (dd, $J=16.2, 5.4$ Hz)      | -     | 4.92 (H-1), 6.72 (H-3) | 137.4 (C-4)                                                      |                          |
|     |                                | C-3              | 6.72 (d, $J=16.2$ Hz)            | -     | 6.14 (H-2)             | 104.6 (C-1), 137.4 (C-4), 127.5 (C-5.9)                          |                          |
|     |                                | C-4              | -                                | 137.4 | -                      | -                                                                |                          |
|     |                                | C-5,9            | -                                | 127.5 | -                      | -                                                                |                          |
|     |                                | OCH <sub>3</sub> | -                                | 53.1  | -                      | -                                                                |                          |
| N12 | Protocatechuic acid            | C-1              | -                                | -     | -                      | -                                                                | CV, CA, CI               |
|     |                                | C-2              | 7.42 (m)                         | 117.6 | -                      | 170.1 (CO), 152.4 (C-4), 146.8 (C-3)                             |                          |
|     |                                | C-3              | -                                | -     | -                      | -                                                                |                          |
|     |                                | C-4              | -                                | -     | -                      | -                                                                |                          |
|     |                                | C-5              | 6.78 (d, $J=8.4$ Hz)             | 115.5 | -                      | 152.4 (C-4), 146.8 (C-3)                                         |                          |
|     |                                | C-6              | 8.01 (dd, $J=8.4, 1.2$ Hz)       | 130.6 | -                      | 170.1 (CO)                                                       |                          |
|     |                                | CO               | -                                | 170.1 | -                      | -                                                                |                          |
| N13 | Coumarin                       | C-2              | -                                | 170.2 | -                      | -                                                                | CA, CI, CP-1, CP-2, CP-4 |
|     |                                | C-3              | -                                | 117.3 | -                      | -                                                                |                          |
|     |                                | C-4              | -                                | 145.6 | -                      | -                                                                |                          |
|     |                                | C-5              | 7.63 (dd, $J=7.8, 1.2$ Hz)       | 129.6 | 7.34 (H-6)             | 155.2 (C-9), 145.6 (C-4), 133.1 (C-7), 117.3 (C-3), 120.3 (C-10) |                          |
|     |                                | C-6              | 7.34 (ddd, $J=8.4, 7.8, 1.2$ Hz) | 125.8 | 7.63 (H-5), 7.59 (H-7) | 155.2 (C-9), 29.6 (C-5), 120.3 (C-10), 117.7 (C-6)               |                          |
|     |                                | C-7              | 7.59 (ddd, $J=8.4, 6, 1.2$ Hz)   | 133.1 | 7.34 (H-6),            | 155.2 (C-9), 129.6 (C-5), 120.3 (C-10), 117.7 (C-8)              |                          |
|     |                                | C-8              | 7.4 (dd, $J=6, 1.8$ Hz)          | 117.7 | -                      | 170.2 (C-2), 155.2 (C-9), 129.6 (C-5)                            |                          |
|     |                                | C-9              | -                                | 155.2 | -                      | -                                                                |                          |
|     |                                | C-10             | -                                | 120.3 | -                      | -                                                                |                          |
|     |                                |                  |                                  |       |                        |                                                                  |                          |
| N14 | Vitamin B3 (Niacin)            | C-2              | 9.02 (d, $J=1.8$ Hz)             | -     | -                      | -                                                                | CP-3                     |



|     |                                 |                            |                            |   |   |   |      |
|-----|---------------------------------|----------------------------|----------------------------|---|---|---|------|
|     |                                 | C-4                        | 8.28 (dt, $J=1.8, 7.8$ Hz) | - | - | - |      |
|     |                                 | C-5                        | 7.54 (dd, $J=4.8, 7.8$ Hz) | - | - | - |      |
|     |                                 | C-6                        | 8.69 (dd, $J=1.2, 4.8$ Hz) | - | - | - |      |
| N15 | Vitamin C (Ascorbic acid)       | C-4                        | 4.78                       | - | - | - | CP-3 |
|     |                                 | C-5                        | 3.89 (t, $J=6$ Hz)         | - | - | - |      |
|     |                                 | C-6                        | 3.67 (d, $J=6$ Hz)         | - | - | - |      |
| N16 | Vitamin ( $\alpha$ -Tocopherol) | C-3                        | 1.81 (m)                   | - | - | - | CP-3 |
|     |                                 | C-4                        | 2.62 (t, $J=6.6$ Hz)       | - | - | - |      |
|     |                                 | C-1'-C12'                  | 1.1-1.6                    | - | - | - |      |
|     |                                 | C2-CH <sub>3</sub>         | 1.24 (s)                   | - | - | - |      |
|     |                                 | C5-CH <sub>3</sub>         | 2.07 (s)                   | - | - | - |      |
|     |                                 | C7-CH <sub>3</sub>         | 1.98 (s)                   | - | - | - |      |
|     |                                 | C8-CH <sub>3</sub>         | 1.95 (s)                   | - | - | - |      |
|     |                                 | C4'-CH <sub>3</sub>        | 0.86 (d, $J=6.6$ Hz)       | - | - | - |      |
|     |                                 | C8'-CH <sub>3</sub>        | 0.85 (d, $J=6.6$ Hz)       | - | - | - |      |
|     |                                 | C13', C12'-CH <sub>3</sub> | 0.87 (d, $J=6.6$ Hz)       | - | - | - |      |

## Supplementary Figures

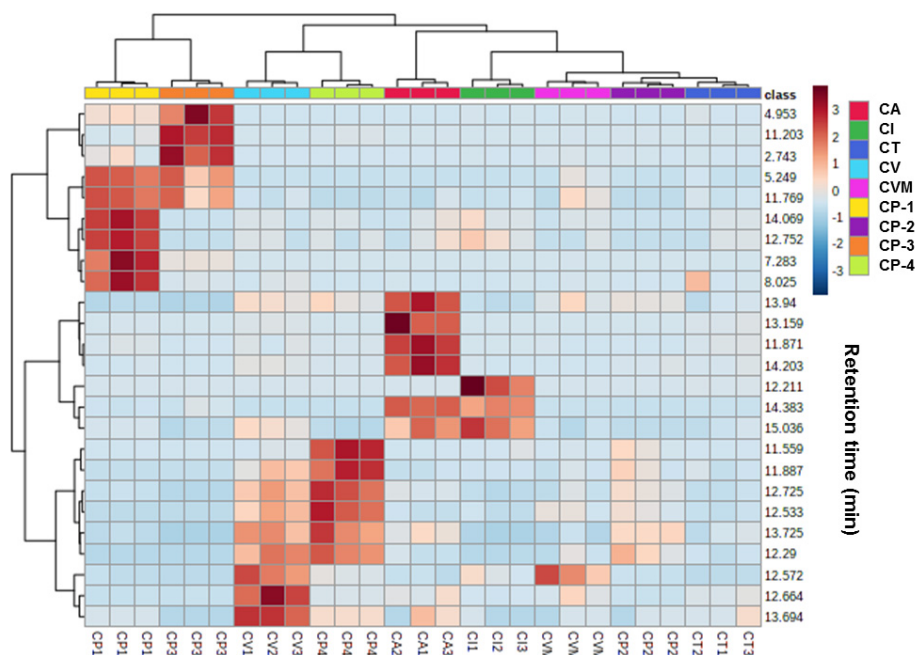

**Figure S1:** Heatmap analysis for all cinnamon samples based on SPME/GC-MS. The Y-axis represents the retention time (min) of the volatiles peak. The peak retention times for all samples and code are listed in **Table S1** and **Table 1**, respectively. Y-axis to the right shows retention times in min showing relative abundance among cinnamon specimens.

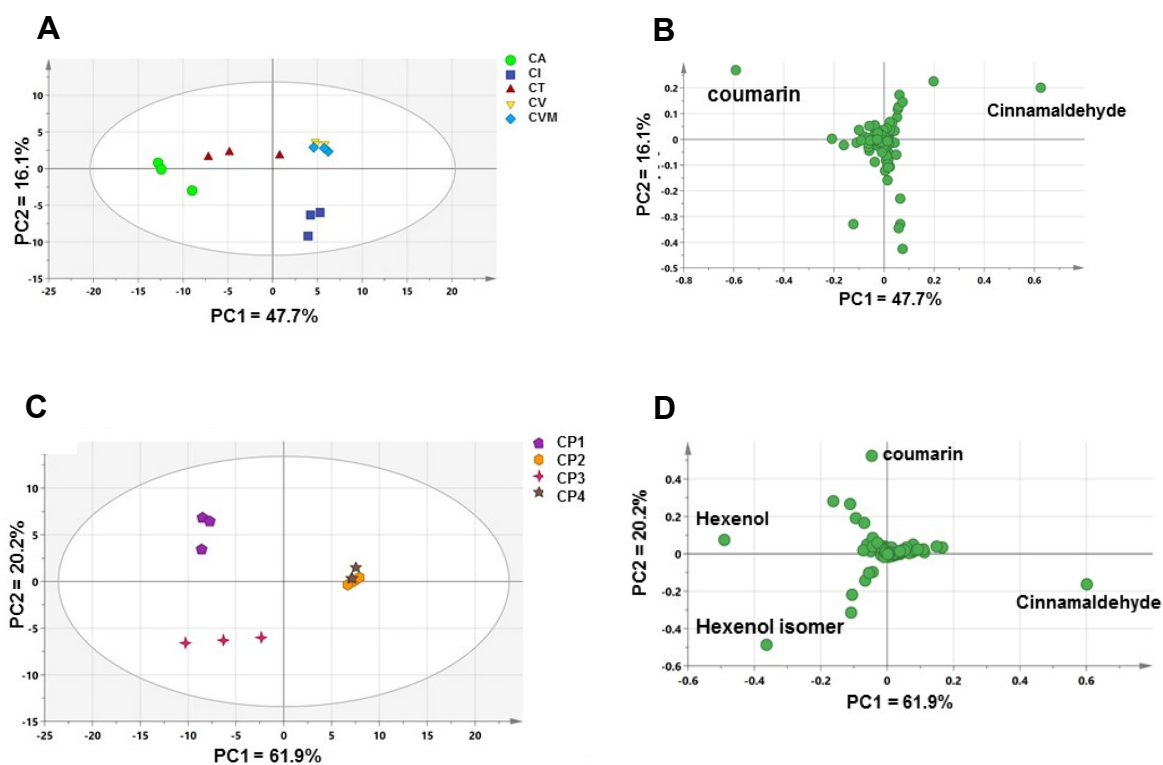

**Figure S2:** PCA score plot (A and C) and loading plot (B and D) for authenticated and commercial cinnamon samples, respectively, of cinnamon volatiles analyzed by SPME/GC-MS. The samples code is listed in **Table 1**.

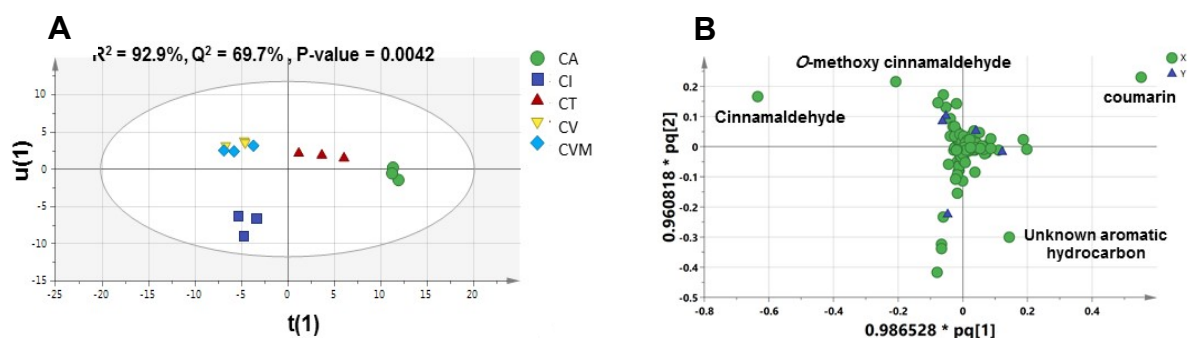

**Figure S3:** OPLS-DA score plot (A) and loading plot (B) of authenticated drugs for cinnamon volatiles analyzed by SPME/GC-MS. Samples code is listed in Table 1.

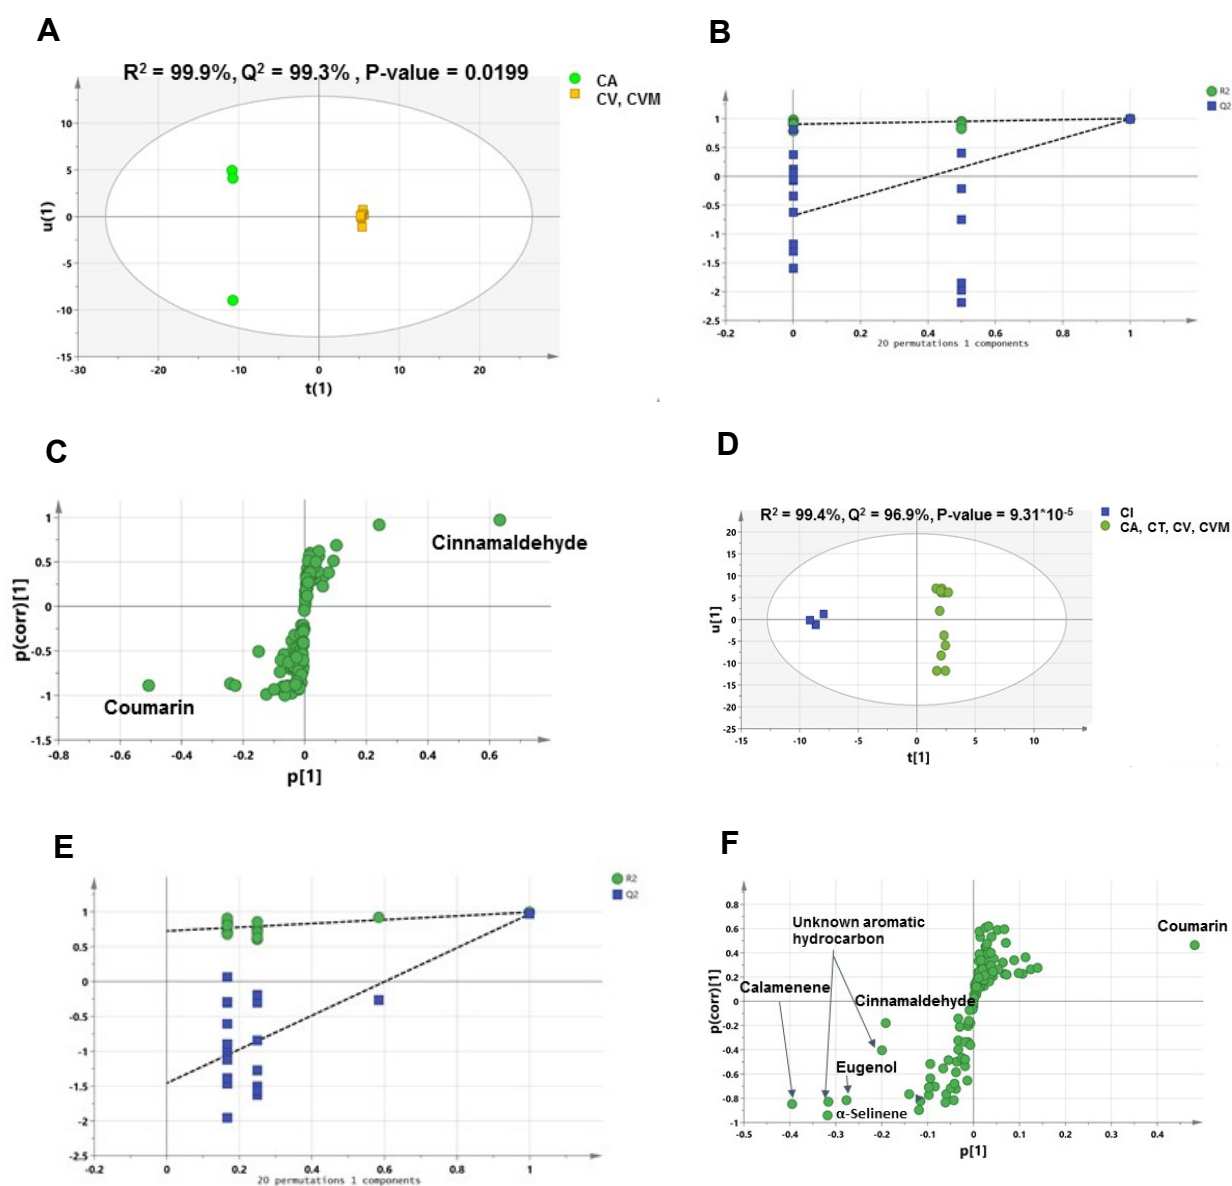

**Figure S4:** OPLS-DA for authentication of *Cinnamomum verum* against other *Cinnamomum* species for volatiles analyzed by SPME/GC-MS. A) and D) are score plot showing validation parameters, B) and E) are permutation plot, and C) and F) are S-plot for analysis CA and CI vs other authenticated cinnamon species. The samples code is listed in Table 1.

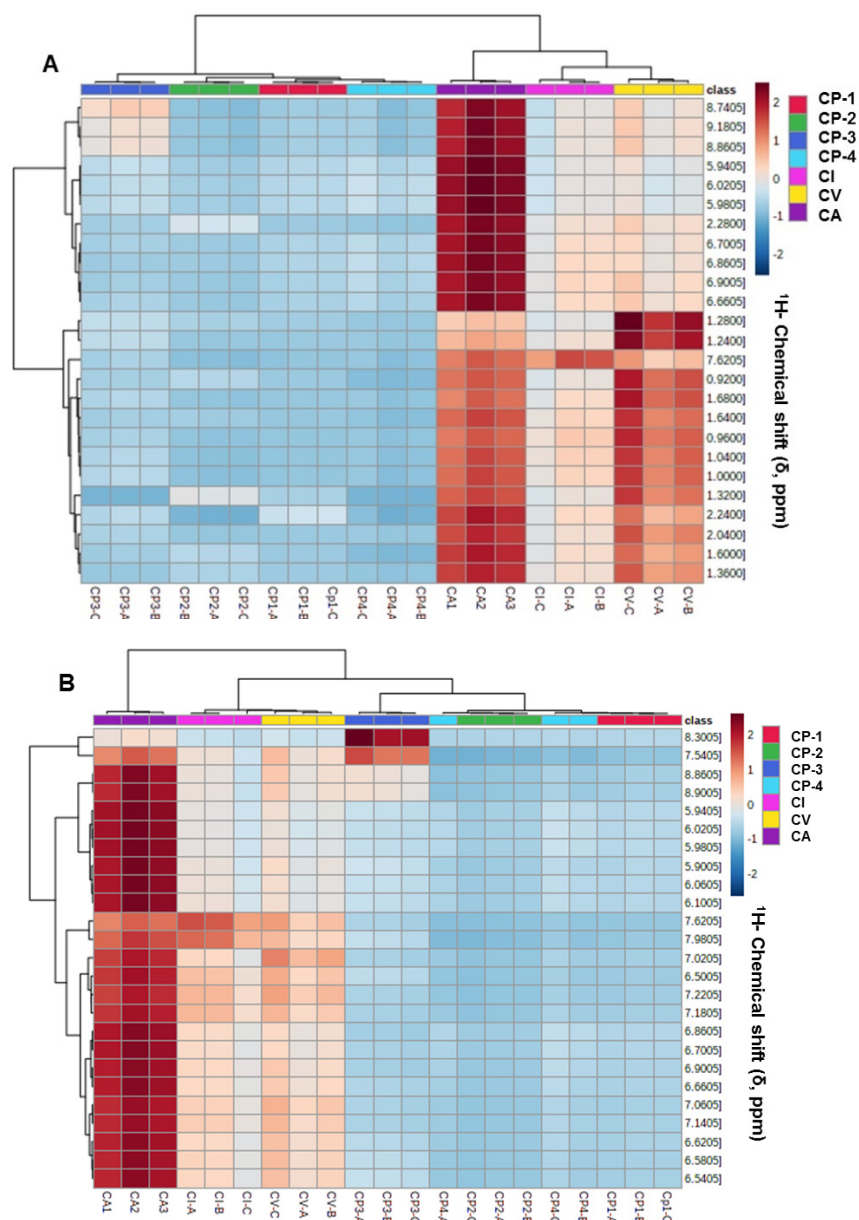

**Figure S5:** Unsupervised heatmap analysis of all cinnamon dataset. **A)** Full-scale ( $\delta_H$  0.0-10.0 ppm) and **B)** aromatic region ( $\delta_H$  5.5-10.0 ppm). The samples code is listed in **Table 1** and the metabolites assignment based on chemical shifts is summarized in **Table S2**. Y-axis to the right shows the chemical shifts showing relative abundance among cinnamon specimens.

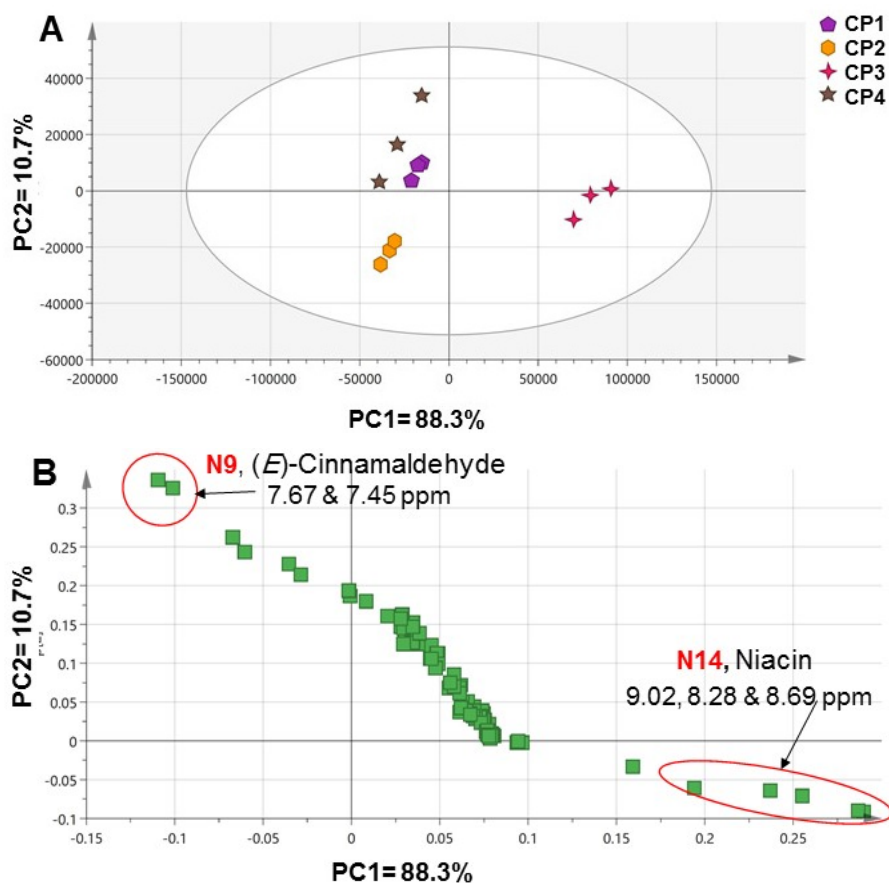

**Figure S6:** Unsupervised data analysis of the commercial cinnamon dataset in the aromatic region ( $\delta_{\text{H}}$  5.5-10.0 ppm). **A)** Principal component analysis (PCA) score plot, and **B)** PCA loading plot. The samples code is listed in **Table 1** and the metabolites assignment is summarized in **Table S2**.

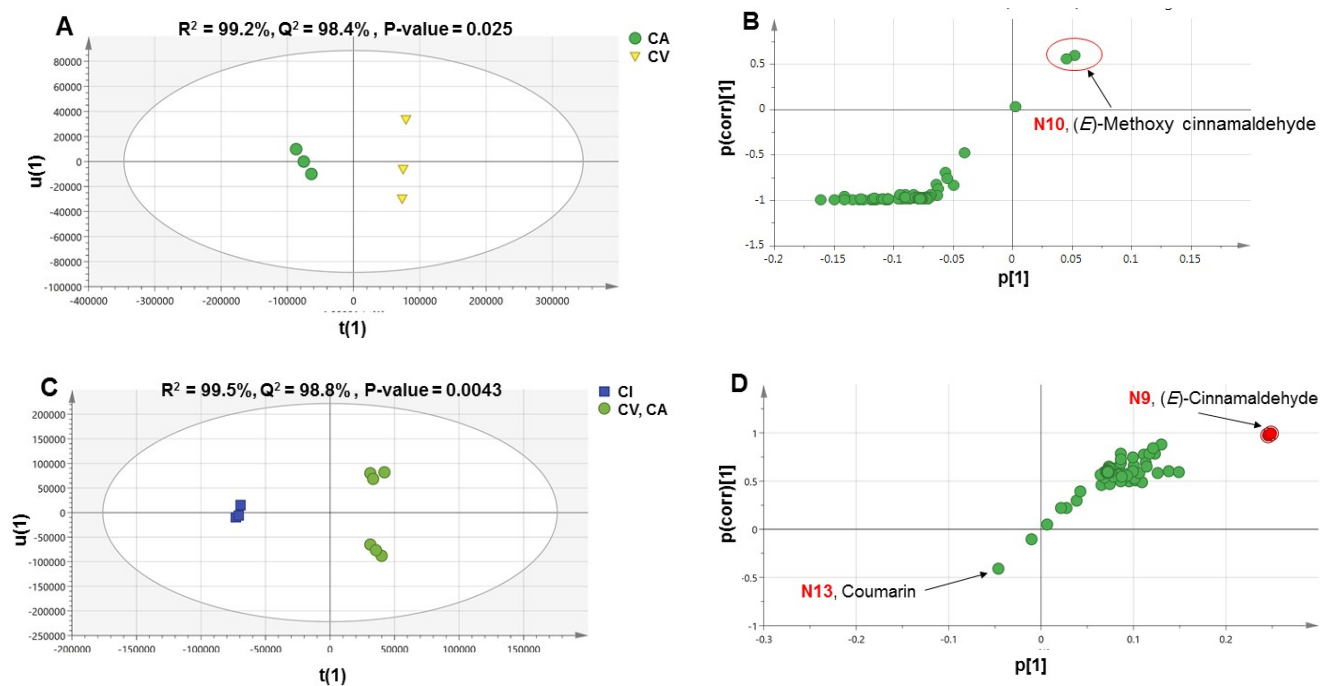

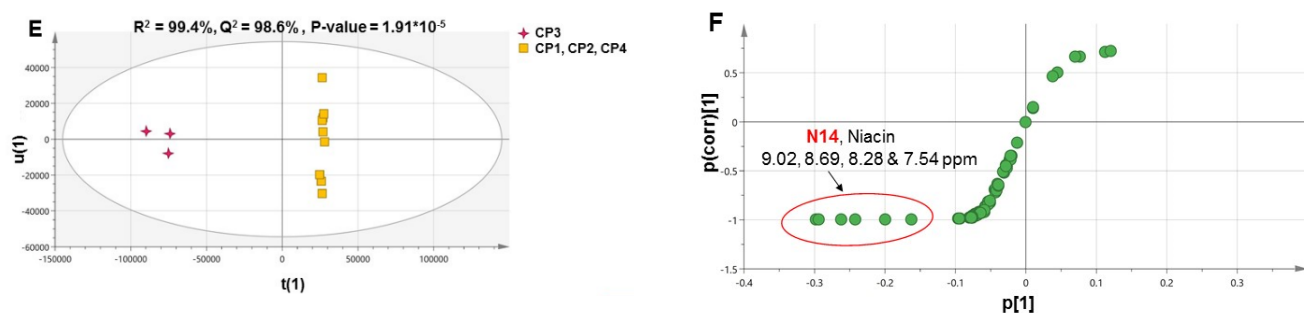

**Figure S7:** Supervised data analysis (OPLS-DA) of cinnamon dataset in the aromatic region ( $\delta_{\text{H}}$  5.5-10.0 ppm). OPLS score plot (A, C, and E) and loading plot (B, D, and F) for modelling of CA vs CV, CI vs CV and CA, in addition to CP3 vs CP1, CP2 and CP4. The samples code is listed in **Table 1** and the metabolites assignment is summarized in **Table S2**.

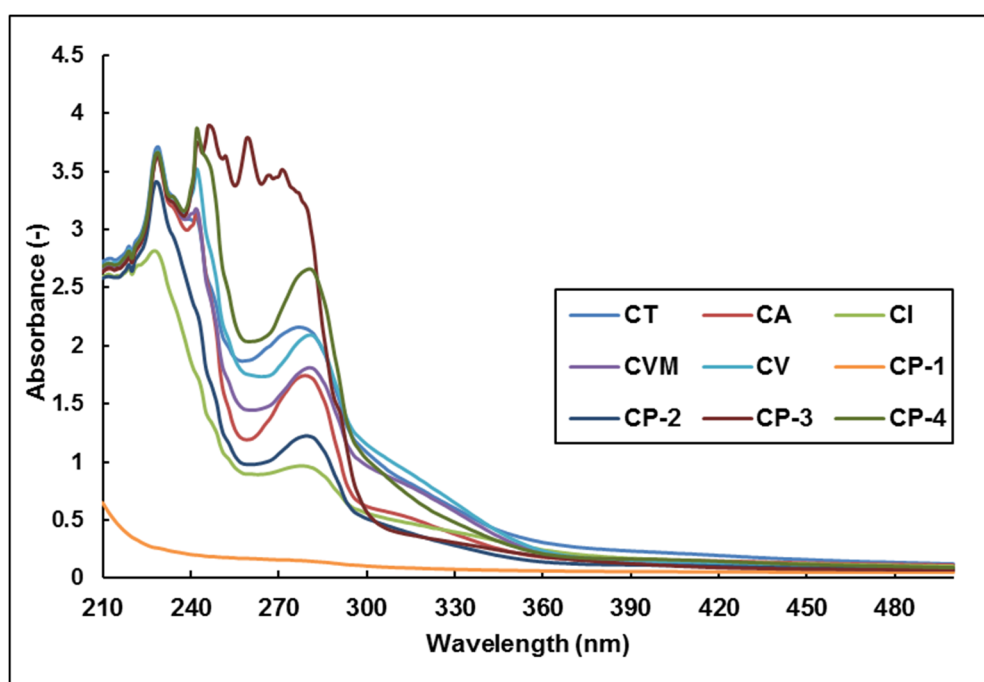

**Figure S8:** UV/Vis spectra of investigated authenticated and commercial cinnamon samples. The samples code is listed in **Table 1**. The figure shows the unique spectrum of CP-3.

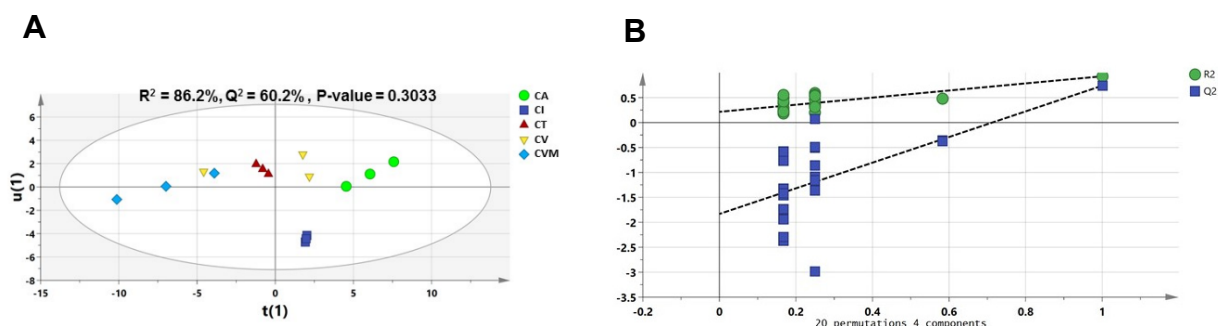

**Figure S9:** Supervised OPLS-DA score plot (A) of authenticated cinnamon samples and permutation calculation (B). The samples code is listed in **Table 1**.

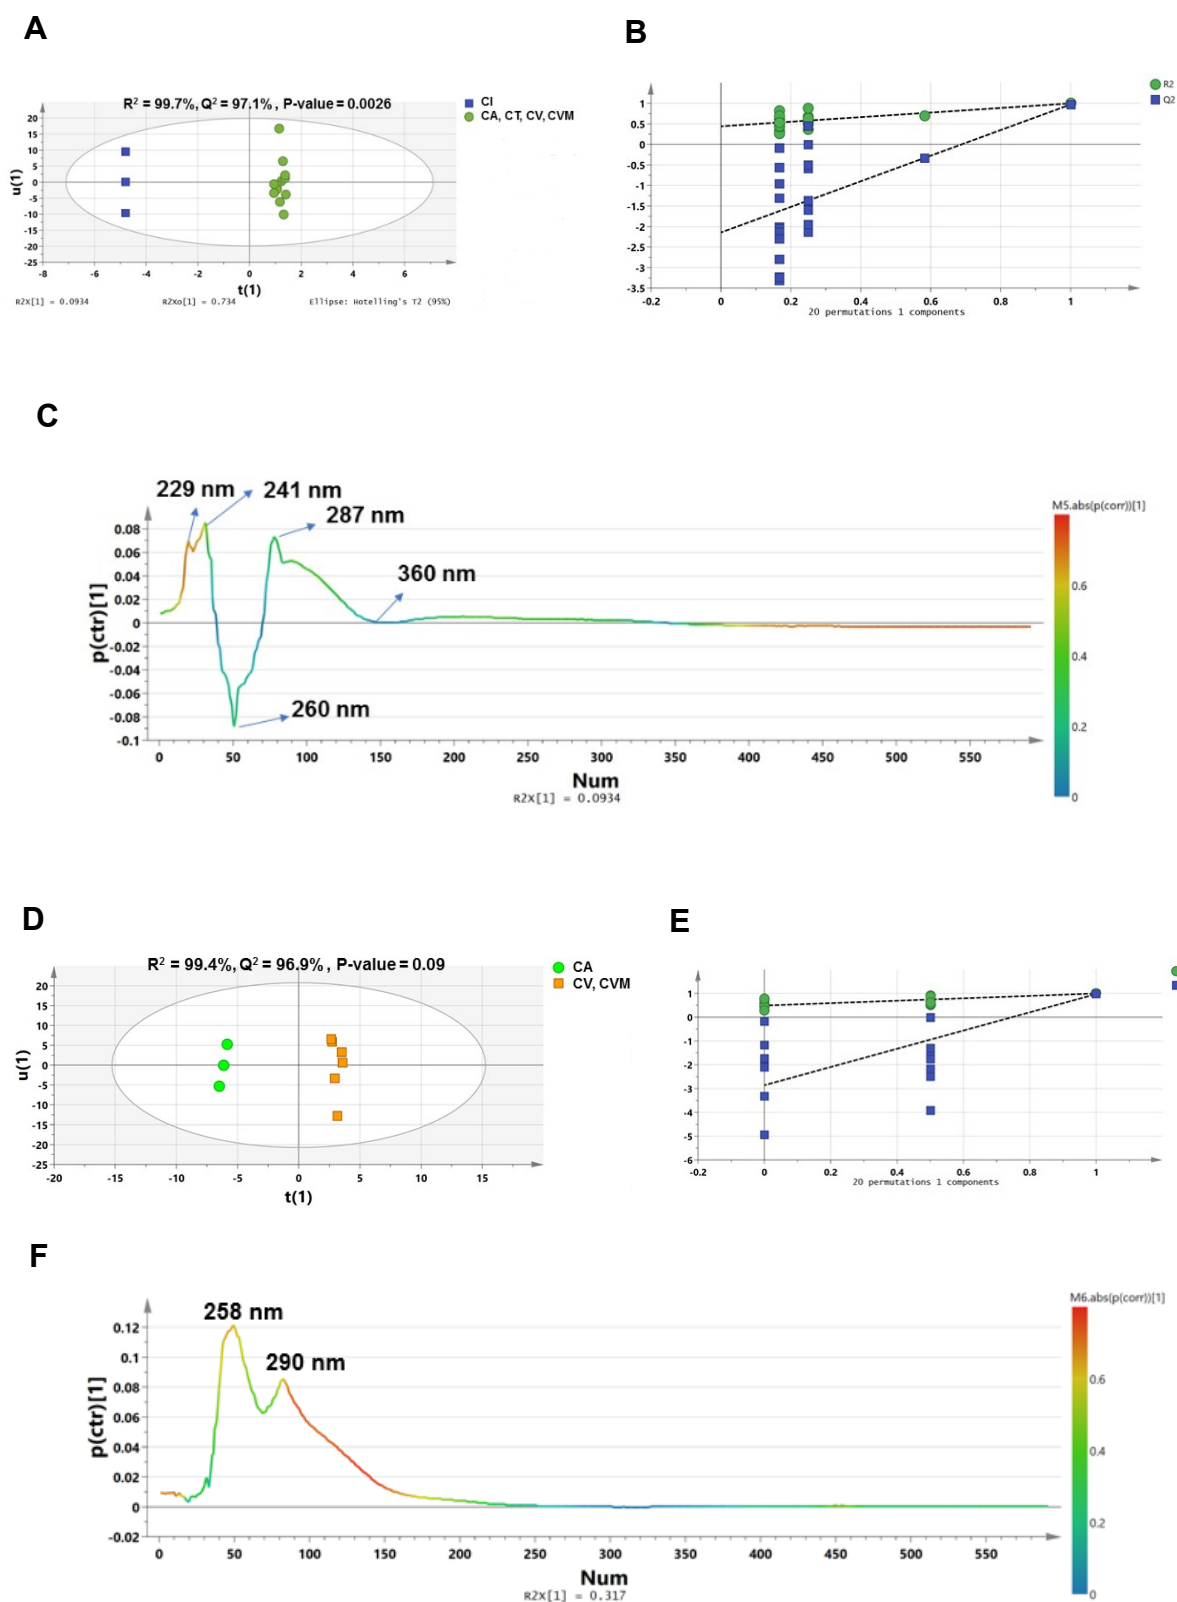

**Figure S10:** Supervised OPLS-DA score plot (A) of CI against other authenticated cinnamon samples and permutation results (B), OPLS-DA line-plot (C). OPLS-DA score plot of CA against CV and CVM samples (D), permutation results (E), and OPLS-DA line-plot (F). The samples code is listed in **Table 1**.

## Raw data

A sample (CP-1) of the NMR data can be shared under the following links

- <sup>1</sup>H-NMR:  
<https://drive.google.com/drive/u/0/folders/1W306Qy6wylD1IyJU2hzBQSsklrHQtD0>
- COSY:  
<https://drive.google.com/drive/u/0/folders/1HAqf0nNod3yh49bRlssnfuoirYTyl-Xw>
- HMBC:  
[https://drive.google.com/drive/u/0/folders/1zJ93i9\\_L4XzWi-kEEAhl4A\\_BAKgilvGo](https://drive.google.com/drive/u/0/folders/1zJ93i9_L4XzWi-kEEAhl4A_BAKgilvGo)
- HSQC:  
<https://drive.google.com/drive/u/0/folders/12pyeOxEITW09VTWQlrHr9BKKFG3qf3ag>

NMR binning matrix:

[https://pharmtantaedu-my.sharepoint.com/:x:/g/personal/ahmed\\_zayed1\\_pharm\\_tanta\\_edu\\_eg/EbNs13uJq3RJuvWCoDTCF2wB5IMBJVjpMNRZYgPDoeHbow?e=qkkAtY](https://pharmtantaedu-my.sharepoint.com/:x:/g/personal/ahmed_zayed1_pharm_tanta_edu_eg/EbNs13uJq3RJuvWCoDTCF2wB5IMBJVjpMNRZYgPDoeHbow?e=qkkAtY)

Also, the raw data of SPME/GC-MS can be found in this link

- SPME/GC-MS identification sheet:

[https://pharmtantaedu-my.sharepoint.com/:x:/g/personal/ahmed\\_zayed1\\_pharm\\_tanta\\_edu\\_eg/EUMD6pWtVotAtjJxk937iYBSDM9ngUa0pXV8oqar2zHag?e=KUcTLf](https://pharmtantaedu-my.sharepoint.com/:x:/g/personal/ahmed_zayed1_pharm_tanta_edu_eg/EUMD6pWtVotAtjJxk937iYBSDM9ngUa0pXV8oqar2zHag?e=KUcTLf)

- Raw data net cdf universal files:

1. CV:

[https://pharmtantaedu-my.sharepoint.com/:u:/g/personal/ahmed\\_zayed1\\_pharm\\_tanta\\_edu\\_eg/EbjzfSUsLAhEtESTAA3GxPsB2-bRTKh1GC5tEAORfSiwSA?e=mYhOhn](https://pharmtantaedu-my.sharepoint.com/:u:/g/personal/ahmed_zayed1_pharm_tanta_edu_eg/EbjzfSUsLAhEtESTAA3GxPsB2-bRTKh1GC5tEAORfSiwSA?e=mYhOhn)

2. CVM:

[https://pharmtantaedu-my.sharepoint.com/:u:/g/personal/ahmed\\_zayed1\\_pharm\\_tanta\\_edu\\_eg/EYtPHIaoBQVNnRTiWbEDfr4BNG4i4nvIV\\_KkWRz\\_DmiIkw?e=0Wmd5o](https://pharmtantaedu-my.sharepoint.com/:u:/g/personal/ahmed_zayed1_pharm_tanta_edu_eg/EYtPHIaoBQVNnRTiWbEDfr4BNG4i4nvIV_KkWRz_DmiIkw?e=0Wmd5o)

3. CT:

[https://pharmtantaedu-my.sharepoint.com/:u:/g/personal/ahmed\\_zayed1\\_pharm\\_tanta\\_edu\\_eg/ERwjumiSE7JLt-7npAW\\_aC4BuMlfigs6ho6KXnb7tgc7-w?e=hHNalj](https://pharmtantaedu-my.sharepoint.com/:u:/g/personal/ahmed_zayed1_pharm_tanta_edu_eg/ERwjumiSE7JLt-7npAW_aC4BuMlfigs6ho6KXnb7tgc7-w?e=hHNalj)
